# Supplementary material
Source: HighWire-hosted journal article supplement (https://srh.bmj.com/highwire/filestream/142730/field_highwire_adjunct_files/0/bmjsrh-2022-201722supp001_data_supplement.pdf)
Supplement: bmjsrh-2022-201722supp001_data_supplement.pdf [file bmjsrh-2022-201722supp001_data_supplement.pdf]

**Supplementary Table 1: Crude and adjusted risk differences for medical abortion outcomes by group (n=1847)**

|                                                                                    | Pharmacies<br>(n=910) |       | Clinics<br>(n=937) |       | Crude Risk<br>Difference<br>(95% CI) | Adjusted Risk<br>Difference*<br>(95% CI) |
|------------------------------------------------------------------------------------|-----------------------|-------|--------------------|-------|--------------------------------------|------------------------------------------|
|                                                                                    | n                     | %     | n                  | %     |                                      |                                          |
| Received additional treatment to complete the abortion                             | 85                    | 9.3%  | 119                | 12.7% | -1.6% (-7.4% - 4.1%)                 | -2.6% (-7.6% - 2.4%)                     |
| Felt confident the abortion was complete                                           | 736                   | 82.0% | 826                | 88.8% | -7.4% (-15.6% - 0.7%)                | -6.9% (-15.4% - 1.6%)                    |
| Visited a health care professional for any other problems, outpatient or inpatient | 29                    | 3.2%  | 108                | 11.5% | -3.6% (-12.9% - 5.6%)                | -4.3% (-15.1% - 6.6%)                    |

\*Adjusted for age, gravidity, previous abortion, and gestational age.
